# Supplementary material for: Irisin Gene Delivery Ameliorates Burn-Induced Sensory and Motor Neuropathy
Source: MDPI journal article supplement (doi:10.3390/ijms21207798), 2020-10-21
Supplement: s1 [file s1]

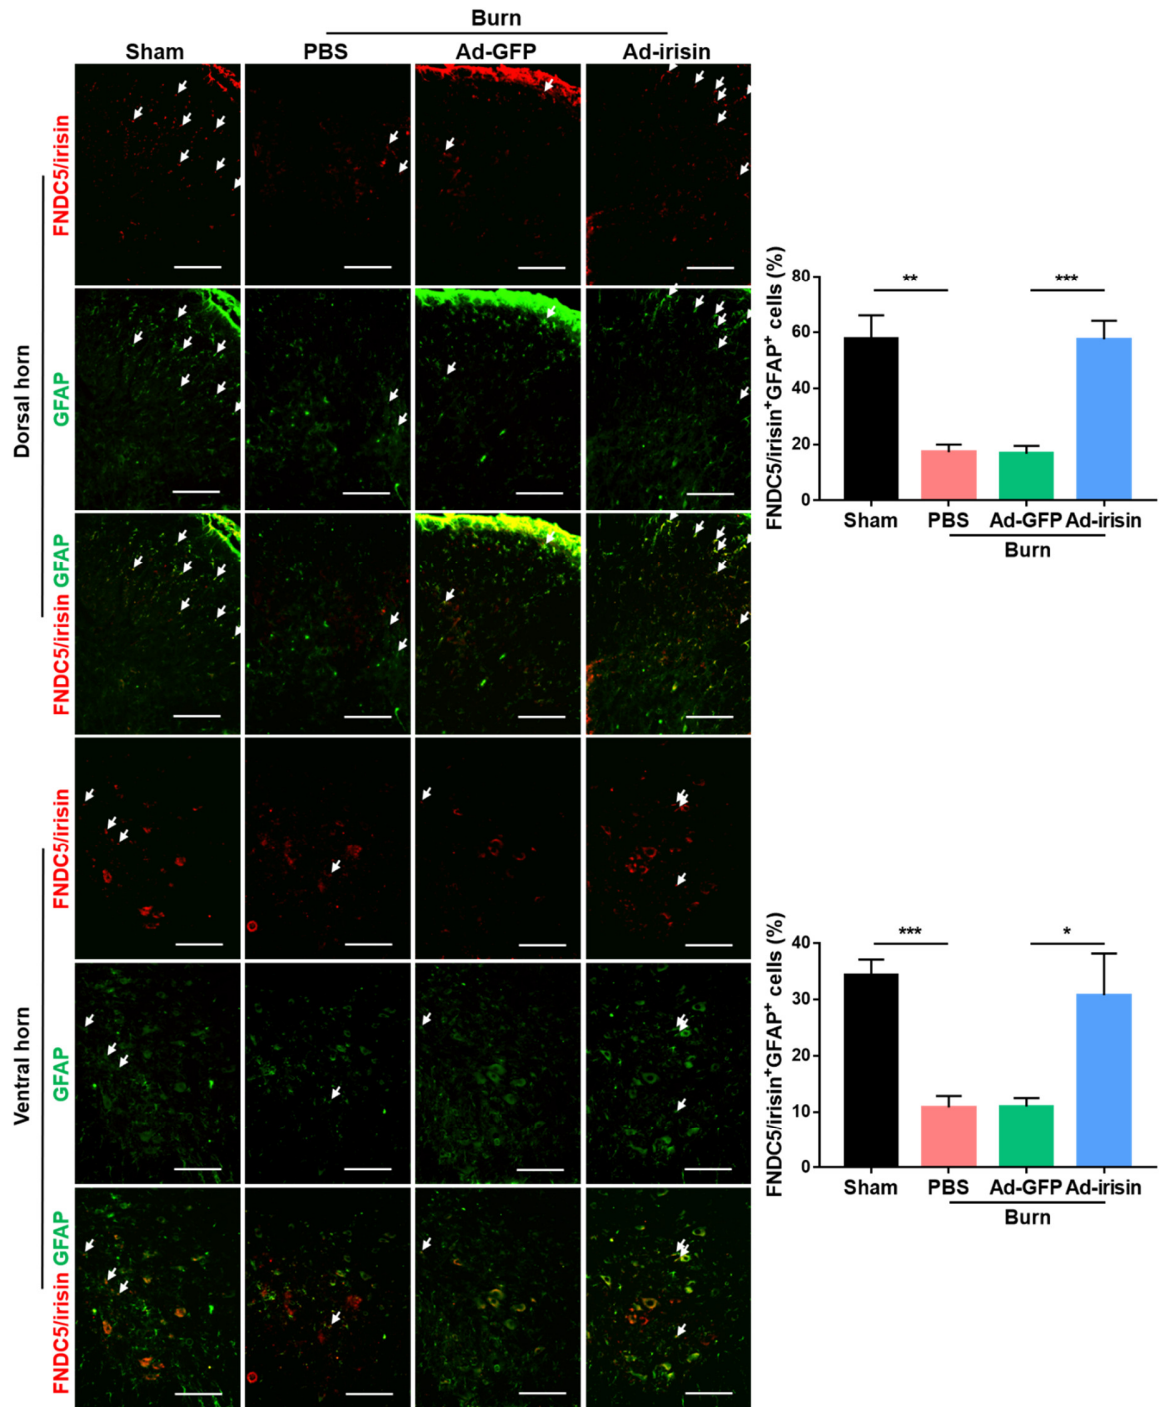

**Figure S1.** Irisin gene delivery restored decreased FNDC5/irisin expression in astrocytes postburn. Double immunofluorescence staining of irisin and GFAP in the dorsal and ventral horns of L4–L6 segments at 4 weeks postburn. Arrowheads indicate double-positive cells. Representative bar graph illustrating the ratio of irisin<sup>+</sup>GFAP<sup>+</sup> to GFAP<sup>+</sup> cells. Error bars, mean  $\pm$  SD. \* $p$  < 0.05, \*\* $p$  < 0.01, \*\*\* $p$  < 0.001, unpaired  $t$  test. Scale bar: 100  $\mu$ m.
